# Supplementary material for: High-performance electrochromo-supercapacitors based on the synergetic effect between aqueous Al3+ and ordered hexagonal tungsten oxide nanorod arrays
Source: Royal Society of Chemistry journal article supplement (doi:10.1039/d0ta01808b), 2020-01-01
Supplement: d0ta01808b1.pdf [file d0ta01808b1.pdf]

## Supplementary Information

### **High-performance electrochromo-supercapacitors based on the synergetic effect between aqueous Al<sup>3+</sup> and ordered hexagonal tungsten oxide nanorod arrays**

Xiangtao Huo,<sup>a</sup> Xiwang Miao,<sup>a</sup> Xing Han,<sup>a</sup> Shujie Tang,<sup>a</sup> Mei Zhang<sup>a</sup> and Min Guo<sup>\*a</sup>

<sup>a</sup> State Key Laboratory of Advanced Metallurgy, School of Metallurgical and Ecological Engineering, University of Science and Technology Beijing, Beijing 100083, PR China.

E-mail: guomin@ustb.edu.cn; Fax: +86-10-6233-4926

Table S1 A summary of the electrochromic or capacitive performance based on different tungsten oxide materials and electrolytes (“/” indicates that this project has not been studied).

| Tungsten oxide materials based on different morphology and structure           | Electrolytes                                         | EC performance |                             |                                          | Capacitive performance                                                                                             | Stability (retention of capacity/ $\Delta T$ )                                                                                                    | References                       |
|--------------------------------------------------------------------------------|------------------------------------------------------|----------------|-----------------------------|------------------------------------------|--------------------------------------------------------------------------------------------------------------------|---------------------------------------------------------------------------------------------------------------------------------------------------|----------------------------------|
|                                                                                |                                                      | $\Delta T$ (%) | Coloring/bleaching time (s) | CE ( $\text{cm}^2 \cdot \text{C}^{-1}$ ) | Specific capacitance                                                                                               |                                                                                                                                                   |                                  |
| Ti-doped $\text{WO}_3$ film <sup>1</sup>                                       | $\text{H}_2\text{SO}_4$                              | 49.1           | 1.7/1.6                     | 68                                       | /                                                                                                                  | /                                                                                                                                                 |                                  |
| Mo-doped $\text{WO}_3$ nanowire array <sup>2</sup>                             | $\text{H}_2\text{SO}_4$                              | 56.7           | 3.2/2.6                     | 123.5                                    | $\sim 182.9 \text{ F} \cdot \text{g}^{-1}$ (1 $\text{A} \cdot \text{g}^{-1}$ , -0.7~0.4 V)                         | 38.2% (4 $\text{A} \cdot \text{g}^{-1}$ , 5500 cycles)                                                                                            |                                  |
| $\text{TiO}_2@/\text{WO}_3$ core/shell nanorod arrays <sup>3</sup>             | $\text{H}_2\text{SO}_4$                              | 57.2           | 2.4/1.6                     | 67.5                                     | /                                                                                                                  | 65.1% (CA test, 10000 cycles)                                                                                                                     | Tu's group <sup>1-4</sup>        |
| $\text{WO}_3$ /polyaniline core/shell nanowire array <sup>4</sup>              | $\text{H}_2\text{SO}_4$                              | 59             | 2.2/3.4                     | 86.3                                     | /                                                                                                                  | /                                                                                                                                                 |                                  |
| porous $\text{WO}_3$ film <sup>5</sup>                                         | $\text{H}_2\text{SO}_4$                              | 97.7           | 6/2.7                       | 118.3                                    | /                                                                                                                  | /                                                                                                                                                 | Lee's group <sup>5-6</sup>       |
| $\text{WO}_3$ nanorods <sup>6</sup>                                            | $\text{H}_2\text{SO}_4$                              | 33.9           | 25.2/18                     | 37.6                                     | /                                                                                                                  | /                                                                                                                                                 |                                  |
| amorphous $\text{WO}_3$ film                                                   | $\text{LiClO}_4/\text{PC}$                           | 72             | 55/30                       | 132                                      | /                                                                                                                  | The color switching speed drops seriously after 1000 laps                                                                                         | Deepa <i>et.al</i> <sup>7</sup>  |
| crystalline/amorphous tungsten oxide core/shell heterostructures               | $\text{LiClO}_4/\text{PC}$                           | 44             | 41/6                        | 82                                       | /                                                                                                                  | 6% decay in $\Delta T$ after 1000 cycles                                                                                                          | Her <i>et.al</i> <sup>8</sup>    |
| amorphous $\text{WO}_3$ film                                                   | $\text{Al}(\text{ClO}_4)_3/\text{LiClO}_4/\text{PC}$ | 91.3           | 13.5/35.6                   | 11~16                                    | /                                                                                                                  | > 90% (CA test, 1000 cycles)                                                                                                                      | Diao's group <sup>9</sup>        |
| $\text{WO}_3$ thin films                                                       | $\text{Al}(\text{ClO}_4)_3/\text{PC}$                | 87             | 12/12                       | 67.59                                    | /                                                                                                                  | almost unchanged (30 cycles)                                                                                                                      | Qiu <i>et.al</i> <sup>10</sup>   |
| $\text{W}_{18}\text{O}_{49}$ nanowires/carbon nanotubes complex material       | $\text{AlCl}_3$ aqueous solution                     | /              | /                           | /                                        | $216 \text{ F} \cdot \text{g}^{-1}$ (about 0.4 $\text{A} \cdot \text{g}^{-1}$ , -0.7~0.6 V)                        | 94.8% (5 $\text{mV} \cdot \text{s}^{-1}$ , 5000 cycles)                                                                                           | Li <i>et.al</i> <sup>11</sup>    |
| mesoporous $\text{WO}_{3-x}$ /carbon compound                                  | $\text{H}_2\text{SO}_4$                              | /              | /                           | /                                        | $103 \text{ F} \cdot \text{g}^{-1}$ (1 $\text{mV} \cdot \text{s}^{-1}$ , -0.2~0.8 V vs. $\text{Ag}/\text{AgCl}$ )  | /                                                                                                                                                 | Jo <i>et.al</i> <sup>12</sup>    |
| mesoporous $\text{WO}_{3-x}$                                                   | $\text{H}_2\text{SO}_4$                              | /              | /                           | /                                        | $199 \text{ F} \cdot \text{g}^{-1}$ (about 0.03 $\text{A} \cdot \text{g}^{-1}$ , -0.1~0.8 V vs. SCE)               | /                                                                                                                                                 | Yoon <i>et.al</i> <sup>13</sup>  |
| crystalline $\text{WO}_3$ - $\text{WO}_3 \cdot 0.5\text{H}_2\text{O}$ mixtures | $\text{H}_2\text{SO}_4$                              | /              | /                           | /                                        | $290 \text{ F} \cdot \text{g}^{-1}$ (25 $\text{mV} \cdot \text{s}^{-1}$ , -0.6~0.2 V vs. $\text{Ag}/\text{AgCl}$ ) | /                                                                                                                                                 | Chang <i>et.al</i> <sup>14</sup> |
| h-WNRAs                                                                        | $\text{AlCl}_3$ aqueous solution                     | 81.5           | 9/14                        | 149.9                                    | $235.4 \text{ F} \cdot \text{g}^{-1}$ at 1 $\text{A} \cdot \text{g}^{-1}$ (-0.7~0 V vs. $\text{Ag}/\text{AgCl}$ )  | 1.8% decay in $\Delta T$ after 10000 s-color-switching process//86.2% retention of capacity after 4000 cycles (stable after first 300-400 cycles) | this work                        |

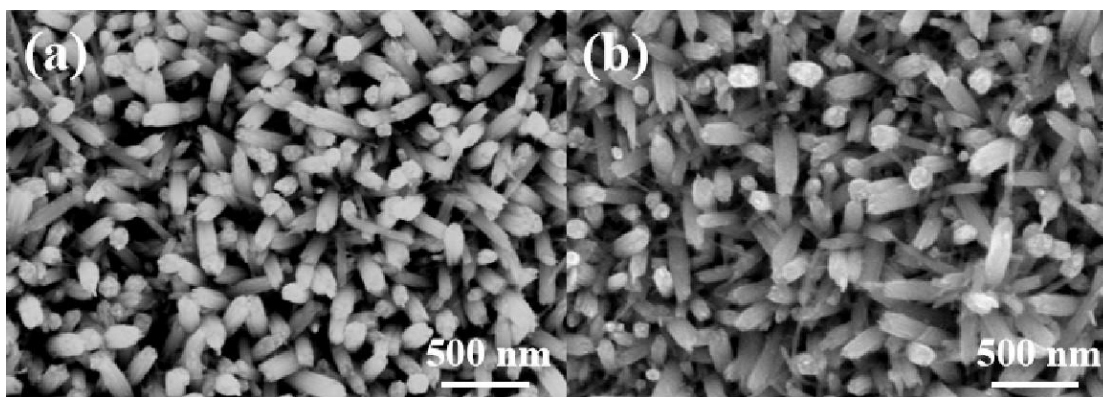

Fig. S1 SEM images of the h-WNRAs material before (a) and after (b) 4000 cycles of galvanostatic test at 5 A·g<sup>-1</sup>.

### References

- 1 G. F. Cai, X. I. Wang, D. Zhou, J. H. Zhang, Q. Q. Xiong, C. D. Gu, J. P. Tu, *RSC Adv.*, 2013, **3**, 6896.
- 2 D. Zhou, F. Shi, D. Xie, D. H. Wang, X. H. Xia, X. L. Wang, C. D. Gu, J. P. Tu, *J. Colloid Interf. Sci.*, 2016, **465**, 112.
- 3 G. F. Cai, D. Zhou, Q. Q. Xiong, J. H. Zhang, X. L. Wang, C. D. Gu and J. P. Tu, *Sol. Energ. Mat. and Sol. C.*, 2013, **117**, 231.
- 4 G. F. Cai, J. P. Tu, D. Zhou, J. H. Zhang, X. L. Wang and C. D. Gu, *Sol. Energ. Mat. and Sol. C.*, 2014, **122**, 51.
- 5 G. F. Cai, M. Q. Cui, V. P. Kumar, P. Darmawan, J. X. Wang, X. Wang, A. L.-S. Eh, K. Qian and P. S. Lee, *Chem. Sci.*, 2016, **7**, 1373.
- 6 J. M. Wang, E. Khoo, P. S. Lee and J. Ma, *J. Phys. Chem. C*, 2009, **113**, 9655.
- 7 M. Deepa, A. G. Joshi, A. Srivastava, S. M. Shivaprasad and S. Agnihotry, *J. Electrochem. Soc.*, 2006, **153**, C365.
- 8 Y. C. Her, and C. C. Chang, *CrystEngComm*, 2014, **16**, 5379.

- 9 H. Yu, J. J. Guo, C. Wang, J. Y. Zhang, J. Liu, X. L. Zhong, G. B. Dong and X. G. Diao, *Electrochim. Acta*, 2019, **318**, 644.
- 10 D. Qiu, H. Ji, X. L. Zhang, H. L. Zhang, H. T. Cao, G. X. Chen, T. Tian, Z. Y. Chen, X. Guo, L. Y. Liang, J. H. Gao and Z. G. Fei, *Inorg. Chem.*, 2019, **58**, 2089.
- 11 K. R. Li, Y. L. Shao, S. Y. Liu, Q. H. Zhang, H. Z. Wang, Y. G. Li and R. B. Kaner, *Small*, 2017, **13**, 1700380.
- 12 C. Jo, J. Hwang, H. Song, A. H. Dao, Y.-T. Kim, S. H. Lee, S. W. Hong, S. Yoon and J. Lee, *Adv. Funct. Mater.*, 2013, **23**, 3747.
- 13 S. Yoon, E. Kang, J. K. Kim, C. W. Lee and J. Lee, *Chem. Commun.*, 2011, **47**, 1021.
- 14 K. H. Chang, C. C. Hu, C. M. Huang, Y. L. Liu and C. I. Chang, *J. Power Sources*, 2011, **196**, 2387.
